# Supplementary material for: Dimensionality-controlled self-assembly of CdSe nanorods into discrete suprastructures within emulsion droplets
Source: Royal Society of Chemistry journal article supplement (doi:10.1039/d0nj05059h), 2020-01-01
Supplement: d0nj05059h1.pdf [file d0nj05059h1.pdf]

## Supporting Information

### **Dimensionality-controlled self-assembly of CdSe nanorods into discrete suprastructures within emulsion droplets**

*Yangen Xie,<sup>a</sup> Chunsheng Wang,<sup>a</sup> Zhijie Yang,<sup>a,b</sup> Huiying Wei,<sup>a\*</sup> Jingjing Wei<sup>a\*</sup>*

*<sup>a</sup>School of Chemistry and Chemical Engineering, Shandong University, Shandong University, Jinan 250100, P.R. China.*

*<sup>b</sup>Key Laboratory of Colloid and Interface Chemistry, Ministry of Education, School of Chemistry and Chemical Engineering, Shandong University, Jinan 250100, P.R. China.*

*To whom correspondence can be addressed: E-mail: [weihuiying@sdu.edu.cn](mailto:weihuiying@sdu.edu.cn);*

*[weijingjing@sdu.edu.cn](mailto:weijingjing@sdu.edu.cn)*



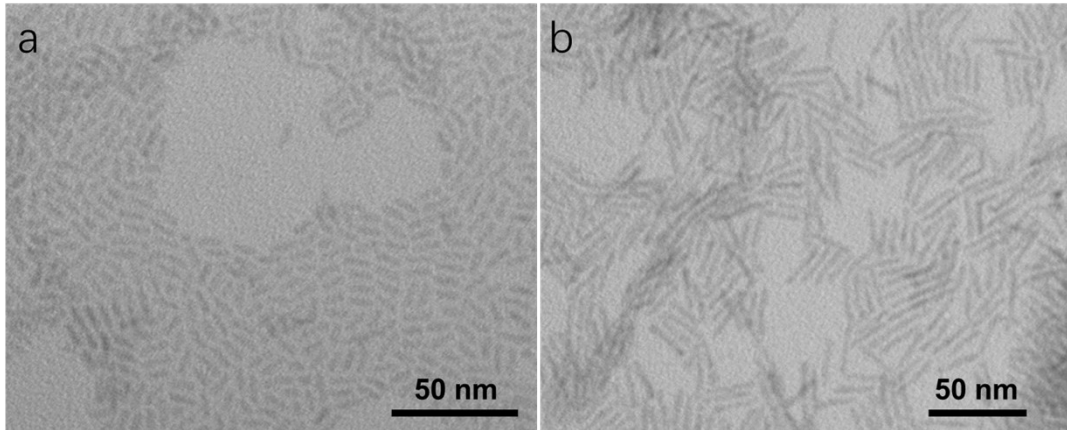

**Fig. S1.** (a) TEM image of CdSe nanorods for 20 min reaction time; (b) TEM image of CdSe nanorods for 90 min reaction time.

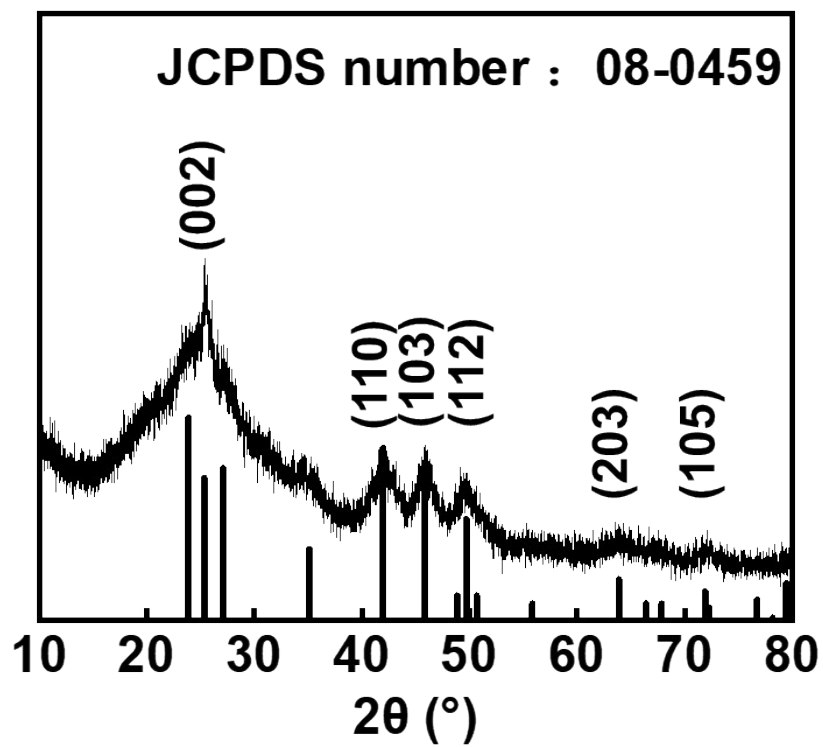

**Fig. S2.** X-ray diffraction (XRD) pattern of the CdSe-AR3 nanorods.

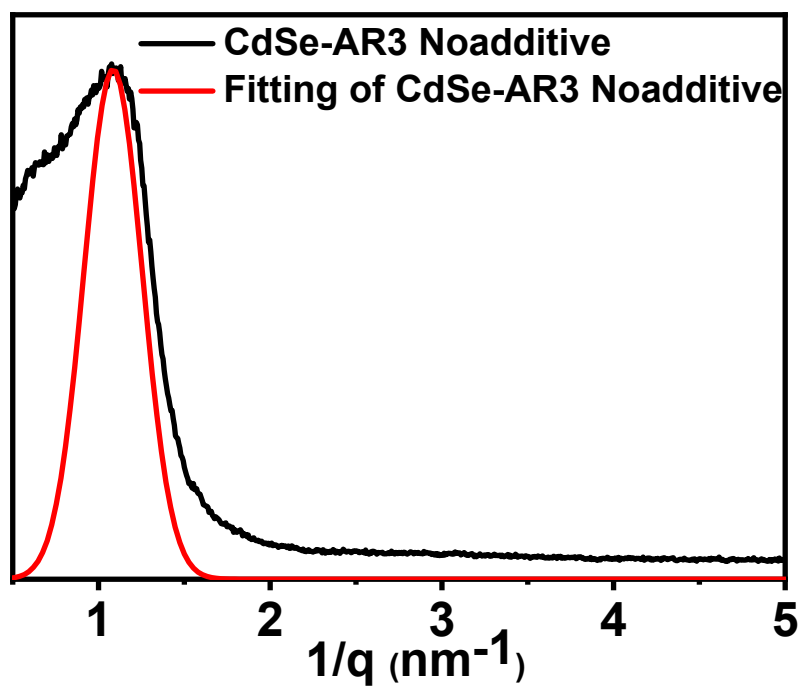

**Fig. S3.** Small-angle X-ray scattering (SAXS) pattern of 3D supracrystalline colloids made of CdSe-AR3 nanorods.
